# Supplementary material for: A Mass Spectrometry Imaging Based Approach for Prognosis Prediction in UICC Stage I/II Colon Cancer
Source: MDPI journal article supplement (doi:10.3390/cancers13215371), 2021-10-26
Supplement: s1 [file s1]

# A Mass Spectrometry Imaging Based Approach for Prognosis Prediction in UICC Stage I/II Colon Cancer

Benedikt Martin <sup>1,†</sup>, Juliana P. L. Gonçalves <sup>2,†</sup>, Christine Bollwein <sup>2</sup>, Florian Sommer <sup>3</sup>, Gerhard Schenkirsch <sup>4</sup>, Anne Jacob <sup>2</sup>, Armin Seibert <sup>5</sup>, Wilko Weichert <sup>2</sup>, Bruno Märkl <sup>1</sup> and Kristina Schwamborn <sup>2,\*</sup>

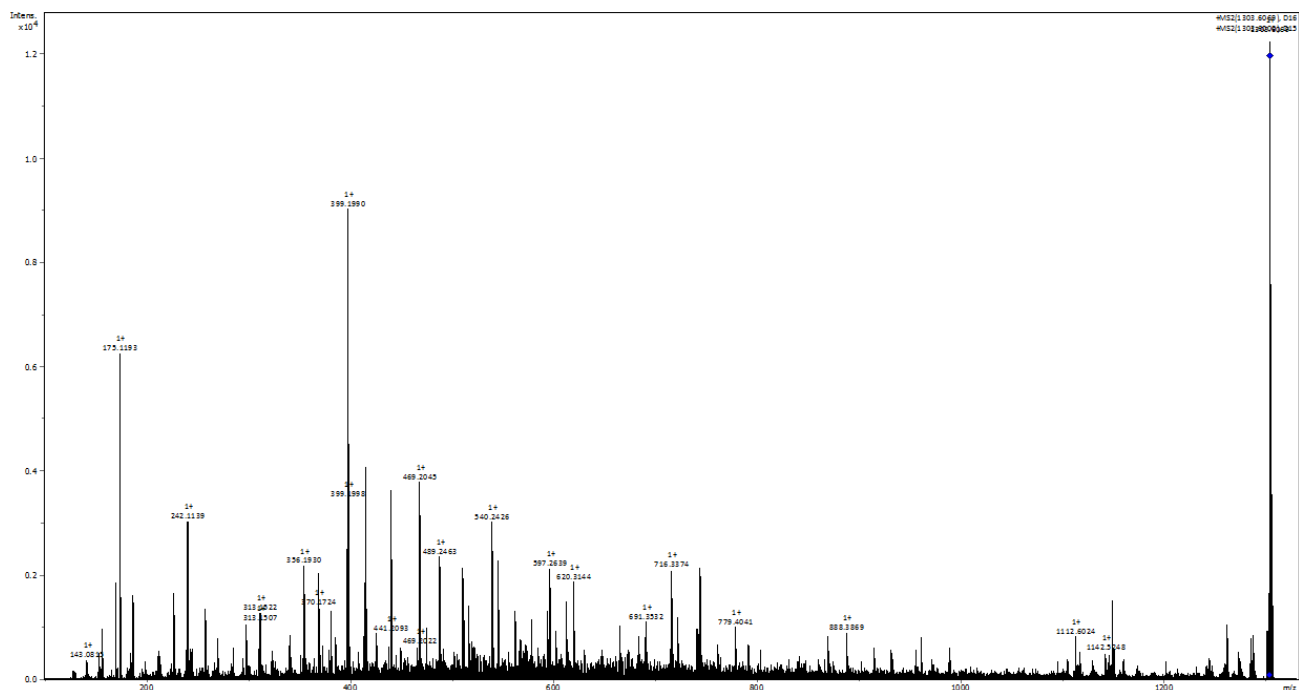

**Figure S1.** Fragmentation spectrum (MS/MS, timsTOF fleX) of the  $m/z$  1303.6. These spectra resulted of a defined isolation mass of  $m/z$  1303.60 (isolation width of 5.00 Da). These spectra are a reconstitution of two different spectra: One spectrum was recorded using a tuning method for lower masses (with fragmentation  $m/z < 400$ ) and a second spectrum was recorded with a method for a wider range of masses ( $m/z > 350$ ).

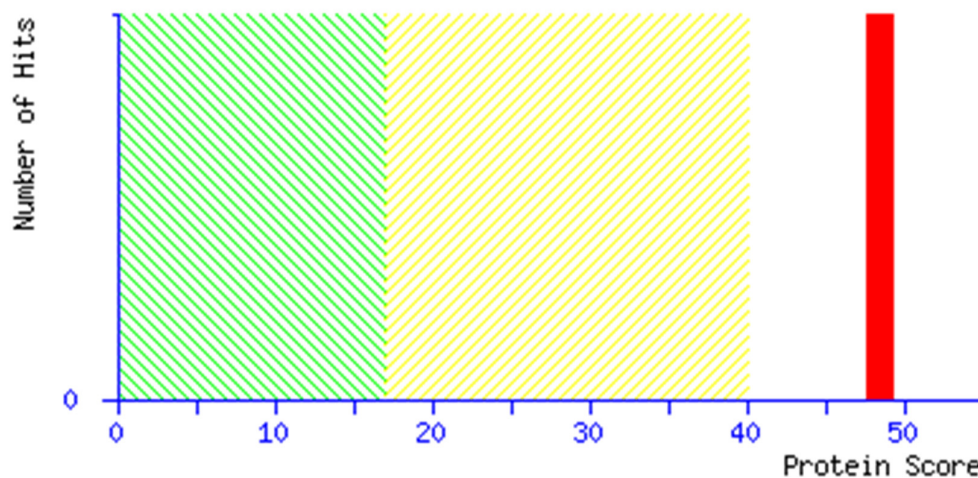

**Figure S2.** Mascot Score Histogram.



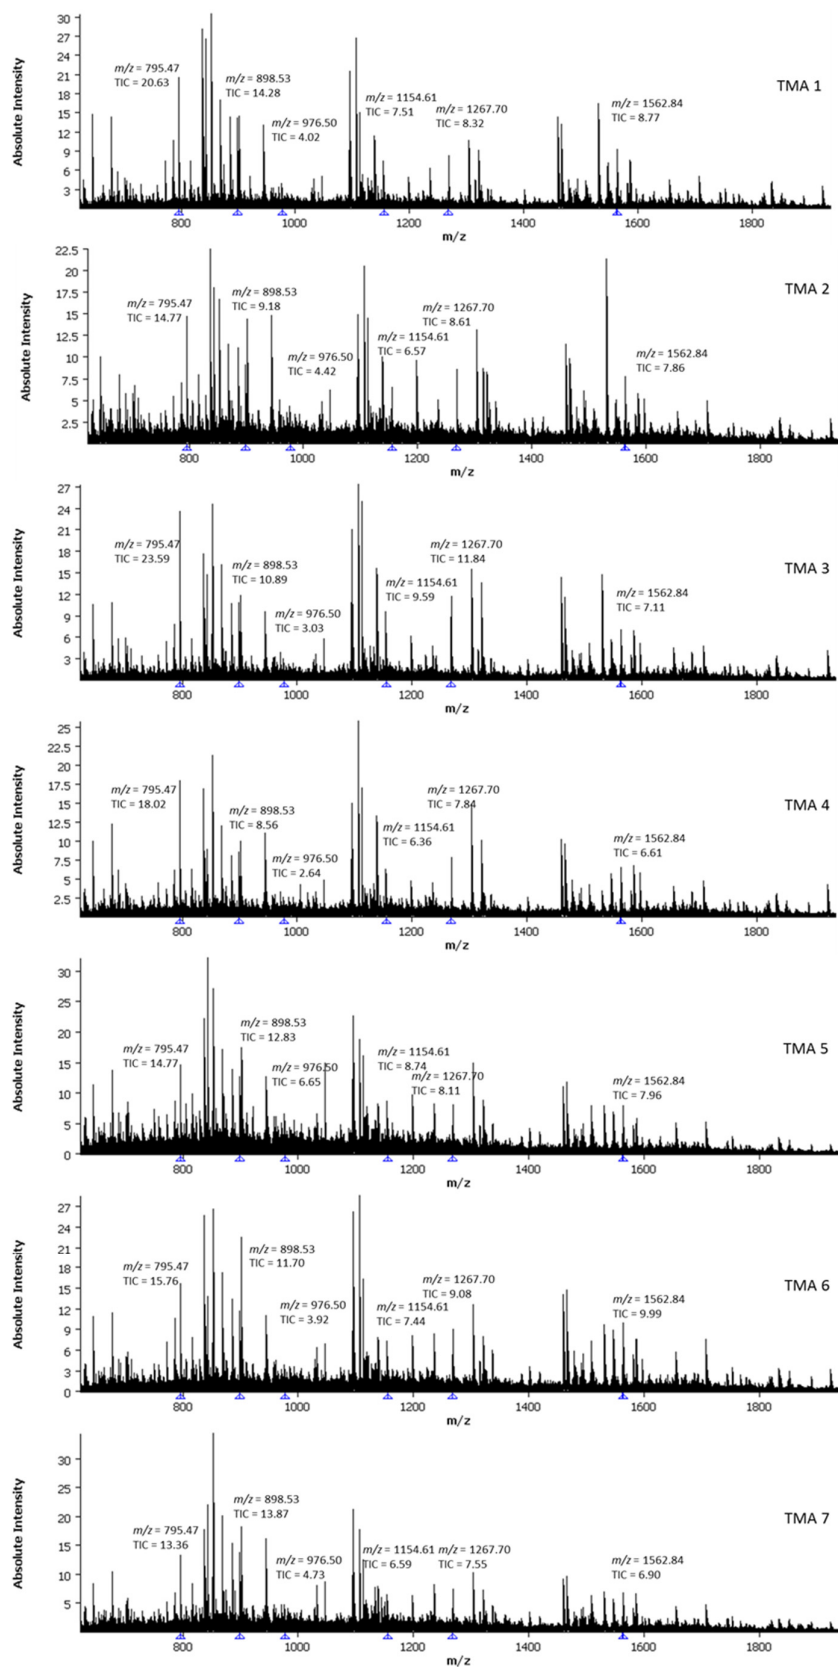

**Figure S4.** Average spectra from liver cores in the TMAs used as reference for assessment of inter-measurement comparability.

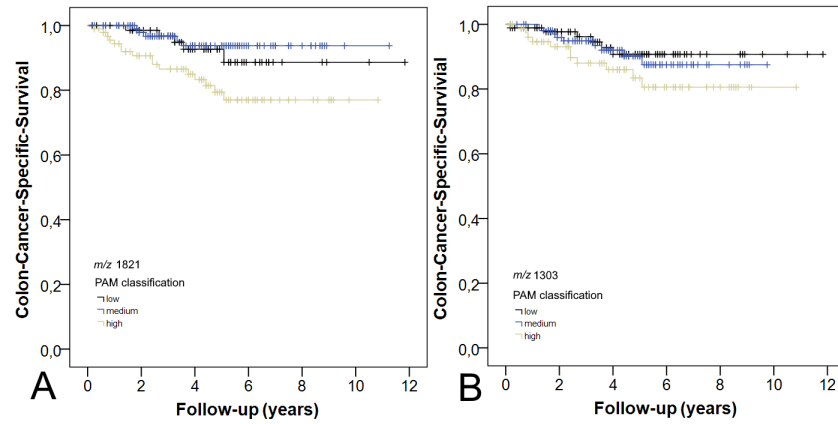

**Figure S5.** A) KM curve for colon-cancer-specific survival. Patients are stratified based on PAM classification of  $m/z$  1821.83 ( $p = 0.008$ ; medium versus high  $p = 0.005$ ; low versus high  $p = 0.052$ ; medium versus low  $p = 0.55$ ;  $n = 276$ ). B) KM curve for colon-cancer-specific survival. Patients are stratified based on PAM classification of  $m/z$  1303.6 ( $p = 0.24$ ; medium versus high  $p = 0.21$ ; low versus high  $p = 0.12$ ; medium versus low  $p = 0.70$ ;  $n = 276$ ).

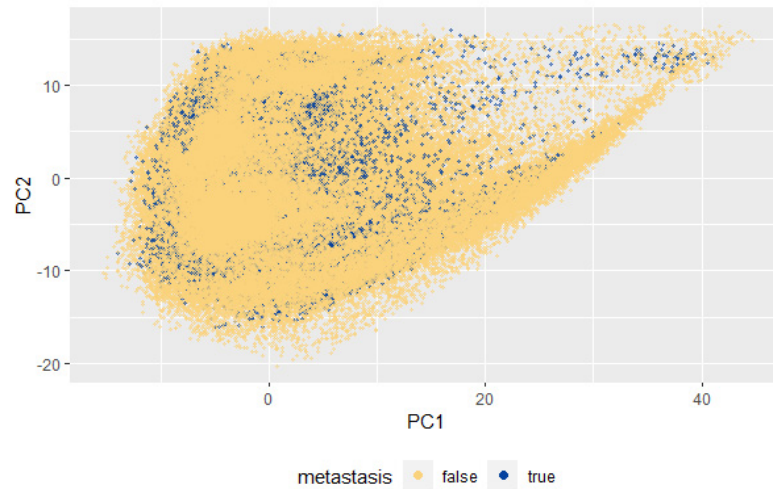

**Figure S6.** Plot of the PCA analysis based on the 130 most intense  $m/z$  features. Patients that developed metastasis are represented in blue, and the patients that did not develop metastasis during follow-up are represented in yellow.

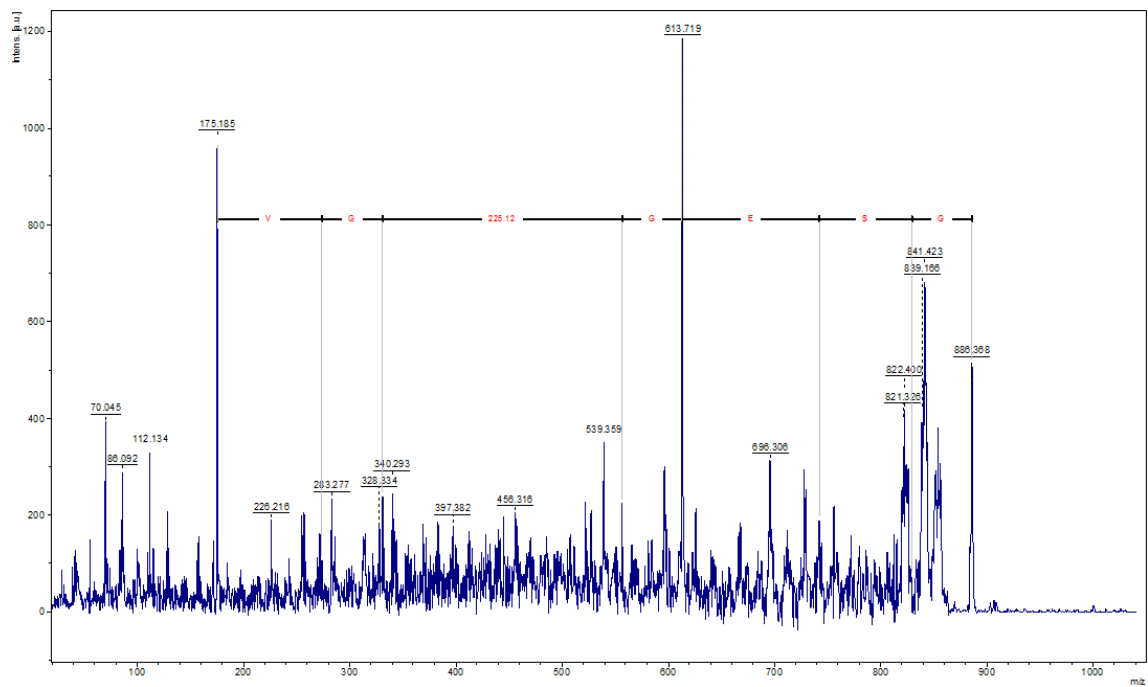

Figure S7. Tentative MS/MS identification of  $m/z$  886.4.

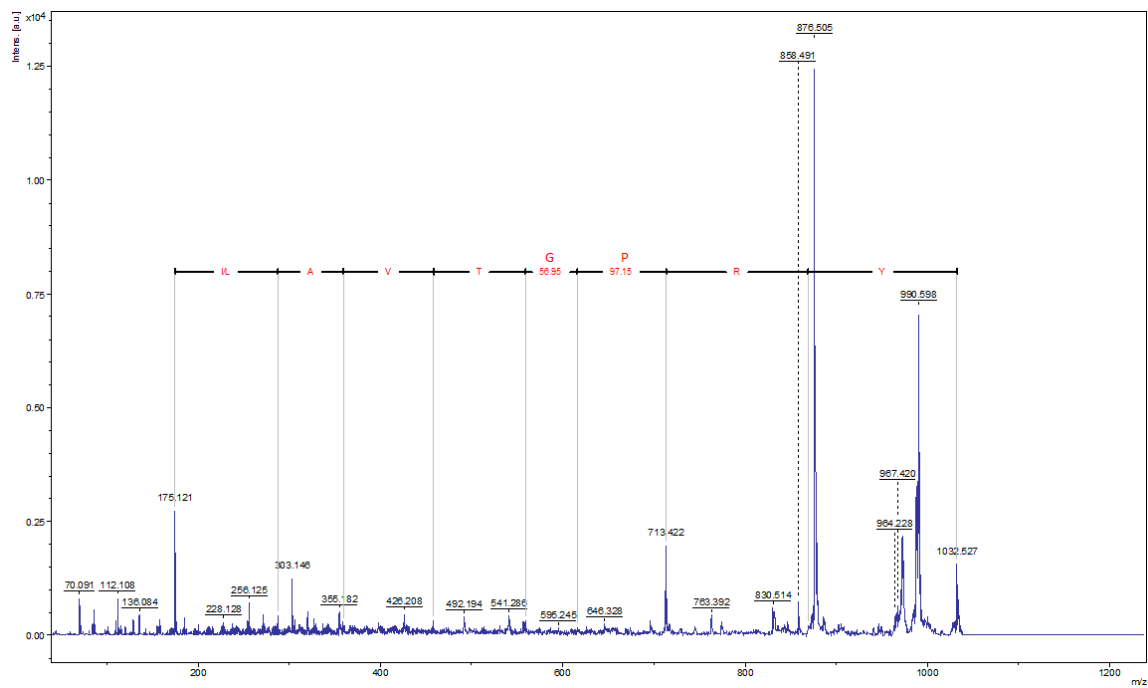

Figure S8. Tentative MS/MS identification of the  $m/z$  1032.5.

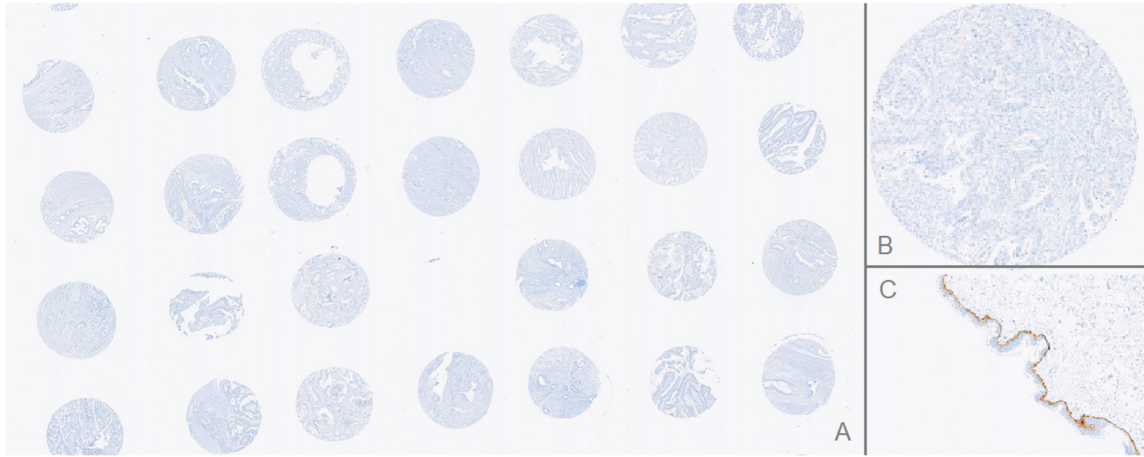

**Figure S9.** Immunohistochemistry of cytokeratin 15; A) section of one representative TMA; B) negative staining result of one core in detail; C) positive on slide control.

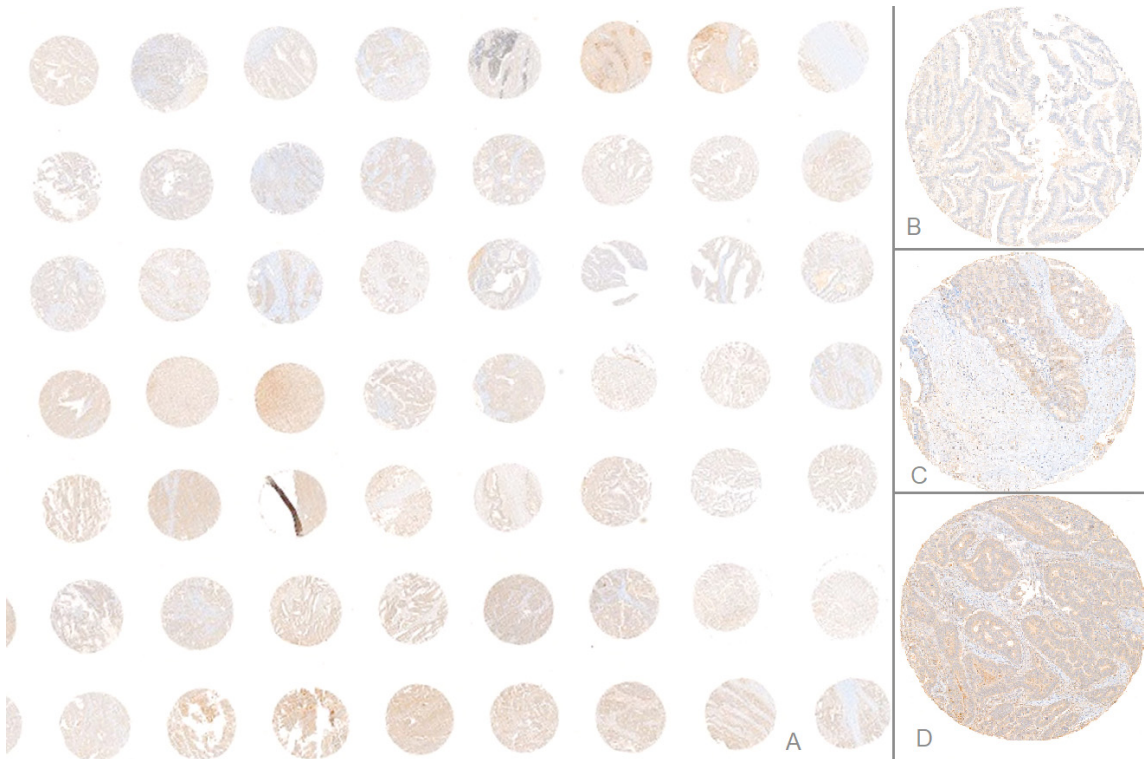

**Figure S10.** Immunohistochemistry of Col3A1; A) section of one representative TMA; B) negative staining result; C) weak positive; D) strong positive.

**Table S1.** Confusion matrix results for the four models. RF – random forest, kNN – k-nearest neighbor, SVM – support vector machine, LDA – linear discriminant analysis.

|                         | RF (500 trees)   | kNN             | SVM             | LDA             |
|-------------------------|------------------|-----------------|-----------------|-----------------|
| Accuracy                | 0.9937           | 0.9935          | 0.9831          | 0.902           |
| 95% CI                  | (0.9931, 0.9942) | (0.9929, 0.994) | (0.9822, 0.984) | (0.8999, 0.904) |
| No Information Rate     | 0.8965           | 0.8965          | 0.8965          | 0.8965          |
| P-Value [Acc > NIR]     | < 2.2e-16        | <2e-16          | < 2.2e-16       | 9.534e-08       |
| Kappa                   | 0.9653           | 0.9649          | 0.9026          | 0.2096          |
| Mcneemar's Test P-Value | < 2.2e-16        | 0.573           | < 2.2e-16       | < 2.2e-16       |
| Sensitivity             | 0.9991           | 0.9963          | 0.9992          | 0.9887          |
| Specificity             | 0.9471           | 0.9693          | 0.8442          | 0.1513          |
| Pos Pred Value          | 0.9939           | 0.9965          | 0.9823          | 0.9098          |
| Neg Pred Value          | 0.9914           | 0.9677          | 0.9914          | 0.6069          |
| Prevalence              | 0.8965           | 0.8965          | 0.8965          | 0.8965          |
| Detection Rate          | 0.8956           | 0.8931          | 0.8957          | 0.8863          |
| Detection Prevalence    | 0.9011           | 0.8963          | 0.9119          | 0.9742          |
| Balanced Accuracy       | 0.9731           | 0.9828          | 0.9217          | 0.5700          |

**Table S2.** Summary of all *m/z*-values with *p* < 0.05 in the exploration set. Highlighted in green are features with *p* < 0.05 in the exploration and test set; highlighted in blue are features with *p* < 0.1 in the test set.

| Overview of p-values of the Kaplan-Meier analysis* |                 |            |
|----------------------------------------------------|-----------------|------------|
|                                                    | Exploration set | Test set   |
| <i>m/z</i>                                         | p-value         | p-value    |
| 603.32                                             | 0.000225757     | 0.40131093 |
| 1820.78                                            | 0.00117734      | 0.08585357 |
| 623.33                                             | 0.002198562     | 0.87550545 |
| 1501.75                                            | 0.002811342     | 0.51215044 |
| 666.34                                             | 0.003393999     | 0.73439213 |
| 1821.83                                            | 0.0075557       | 0.01281608 |
| 616.39                                             | 0.010682376     | 0.05085195 |
| 710.39                                             | 0.011656222     | 0.42320477 |
| 1998.01                                            | 0.014561757     | 0.53860067 |
| 1176.55                                            | 0.016260784     | 0.85765962 |
| 1598.79                                            | 0.016290998     | 0.57955638 |
| 920.47                                             | 0.017738762     | 0.74103349 |
| 1288.67                                            | 0.026648082     | 0.51482455 |
| 656.26                                             | 0.028644741     | 0.01452846 |
| 759.41                                             | 0.030524084     | 0.66207935 |
| 1133.57                                            | 0.031270459     | 0.0613477  |
| 1150.59                                            | 0.031808426     | 0.80806958 |
| 602.32                                             | 0.034813685     | 0.70019195 |
| 607.21                                             | 0.035259135     | 0.49593758 |
| 1039.55                                            | 0.035365338     | 0.46934992 |
| 2951.38                                            | 0.035938029     | 0.42166608 |
| 1622.73                                            | 0.036206937     | 0.24862981 |
| 613.32                                             | 0.036874602     | 0.89095681 |
| 1094.56                                            | 0.037463774     | 0.68328973 |
| 2706.13                                            | 0.038607591     | 0.06018686 |
| 1076.57                                            | 0.039304063     | 0.26619165 |
| 1303.6                                             | 0.040716569     | 0.09142353 |
| 2712.17                                            | 0.040834712     | 0.36546008 |
| 2953.4                                             | 0.041407977     | 0.52075282 |

|         |             |            |
|---------|-------------|------------|
| 647.34  | 0.041438481 | 0.17819513 |
| 1321.67 | 0.042150831 | 0.1043217  |
| 673.4   | 0.042281203 | 0.75931796 |
| 2104.09 | 0.043208088 | 0.16692916 |
| 2295.03 | 0.043521947 | 0.10900229 |
| 1530.75 | 0.044513376 | 0.92311936 |
| 2334.14 | 0.045759626 | 0.27342927 |
| 620.31  | 0.0467169   | 0.25932014 |
| 2369.98 | 0.049334071 | 0.51179223 |
| 974.53  | 0.049571296 | 0.56685499 |

**Table S3.** Peptide identification by MS/MS.

| Measured<br><i>m/z</i> . | Sequence                                 | Description                           |
|--------------------------|------------------------------------------|---------------------------------------|
| 1303.6                   | R.GSPGGPGAAGFPGAR.G +<br>3 Oxidation (P) | CO3A1 Collagen alpha-1 (III)<br>chain |
| 1032.5                   | R.YRPGTVALR.E                            | Histone H3                            |
| 886.4                    | R.GSEGPQGV.R                             | CO1A1 Collagen alpha (I) chain        |

**Table S4.** Pairwise comparison of the Area Under Curve of the Receiver Operator Characteristic (AUC\_ROC). Possible identification based on previously published reports.

| <i>m/z</i> | AUC_ROC   | Possible ID                             |
|------------|-----------|-----------------------------------------|
| 1138.5896  | 0.5873484 | +1 Collagen alpha-1(III) chain [1]      |
| 943.581177 | 0.5766103 | +1                                      |
| 944.555237 | 0.572499  | +1 Histone 2A[1]                        |
| 1198.68958 | 0.5701885 | +1 Actin[1]                             |
| 1111.60791 | 0.556772  | +1 Annexin A2[1]                        |
| 1320.69153 | 0.5543657 | +1 Keratin, type II cytoskeletal[1]     |
| 960.481262 | 0.5542658 | +1                                      |
| 805.409668 | 0.5536868 | +1                                      |
| 958.533142 | 0.5526416 | +1 Stress-70 protein, mitochondrial [2] |
| 971.585632 | 0.5496143 | +1                                      |

**Table S5.** Most prominent features resulting from forward feature calculation.

| <i>m/z</i> | Accuracy  |
|------------|-----------|
| 781.3989   | 0.8982438 |
| 886.4749   | 0.8993368 |
| 1032.585   | 0.8983325 |

**Table S6.** Relationship between *m/z* 1303 PAM classification and Col3A1 immunohistochemistry. Pearson's correlation coefficient: 0.17.

| PAM clustering of <i>m/z</i> 1303 | Immunohistochemistry Col3A1 |    |      |    |        |    |
|-----------------------------------|-----------------------------|----|------|----|--------|----|
|                                   | negative                    |    | weak |    | strong |    |
|                                   | n                           | %  | n    | %  | n      | %  |
| low                               | 28                          | 32 | 36   | 41 | 23     | 26 |
| medium                            | 29                          | 28 | 54   | 53 | 19     | 19 |
| high                              | 33                          | 43 | 35   | 46 | 8      | 11 |

## References:

1. Groseclose, M.R.; Massion, P.P.; Chaurand, P.; Caprioli, R.M. High-throughput proteomic analysis of formalin-fixed paraffin-embedded tissue microarrays using MALDI imaging mass spectrometry. *Proteomics* **2008**, *8*, 3715–3724,



doi:10.1002/pmic.200800495.

2. Casadonte, R.; Kriegsmann, M.; Kriegsmann, K.; Hauk, I.; Meli, R.R.; Mller, C.S.L.; Kriegsmann, J. Imaging Mass Spectrometry-Based Proteomic Analysis to Differentiate Melanocytic Nevi and Malignant Melanoma. *Cancers* 2021, Vol. 13, Page 3197 **2021**, 13, 3197, doi:10.3390/CANCERS13133197.
